# Supplementary material for: Carbon sheathed molybdenum nitride nanoparticles anchored on reduced graphene oxide as high-capacity sodium-ion battery anodes and supercapacitors
Source: Royal Society of Chemistry journal article supplement (doi:10.1039/c7nj04764a), 2018-01-01
Supplement: c7nj04764a1.pdf [file c7nj04764a1.pdf]

## **Supplementary file**

### **Carbon sheathed molybdenum nitride nano-particles anchored on reduced graphene oxide as high capacity sodium-ion battery anodes and supercapacitors.**

#### **Characterization and Testing**

Morphological characterization of the nanostructures was carried using a field-emission scanning electron microscopy (FE-SEM, Nova NanoSEM 230 FEI operating at 10kV, no metal coating was applied to the samples), high resolution transmission electron microscopy (HRTEM; JEOL, JEM-2011, 200 kV), structural analysis by Raman spectra (LabRAM HR UV/vis/NIR Horiba Jobin-Yvon, France) and chemical analysis by X-ray photoelectron spectroscopy (AXIS SUPRA, using Al K $\alpha$  X-ray sources). The XPS spectra were curve fitted with a mixed Gaussian-Lorentzian shape using the freeware XPSPEAK version 4.1. Surface area and porosity were measured by Nitrogen adsorption and desorption isotherms at 77K using a BEL Japan Inc. Belsorp Mini II Surface Area and Pore Size Analysis system.

Electrochemical tests were conducted using CR2032 coin-type test cells assembled in argon- filled glove box. Working electrodes were prepared with active materials and poly(acrylic acid) as the binder (mass ratio of 85: 15) were added to ethanol and mixed into a homogeneous slurry. The slurry was cast on a fresh glass plate cleaned with piranha solution and dried at 100 °C in vacuum for 5 h. The coin cells were assembled with pure sodium foil as counter electrode, a glass fiber as separator, 1M NaClO<sub>4</sub> in ethylene carbonate/propylene carbonate (1:1 v/v) as electrolyte. The working electrodes were composed of 0.5 g of active material and a sodium foil separated by a micro-porous Celgard 2400 membrane. Galvanostatic charge-discharge cycling tests were performed using an WBCS 3000, Won-A-Tech, Korea battery testing system in the voltage range between 0.001 - 3 V).

**Figure S1** HRTEM micrograph of carbon encapsulated molybdenum nitride anchored on reduced graphene oxide.

**Figure S2** XRD of graphene oxide and Mo<sub>2</sub>N@C-rGO

**Figures S3** HAADF micrograph of carbon coated molybdenum nitride carbon coated molybdenum nitride anchored on reduced graphene oxide.

**Figure S4** STEM-HAADF elemental map showing distribution of molybdenum, carbon and nitrogen moieties.

**Figure S5** SEM micrographs of carbon nanotubes anchored on reduced graphene oxide synthesized from diazonium grafted graphene oxide using palladium as the catalyst.

**Figure S6** SEM micrographs of carbon nanotubes anchored on reduced graphene oxide synthesized from diazonium grafted graphene oxide using iron as the catalyst.

**Figure S7** Pore size distribution of graphene oxide and Mo<sub>2</sub>N@C-rGO.

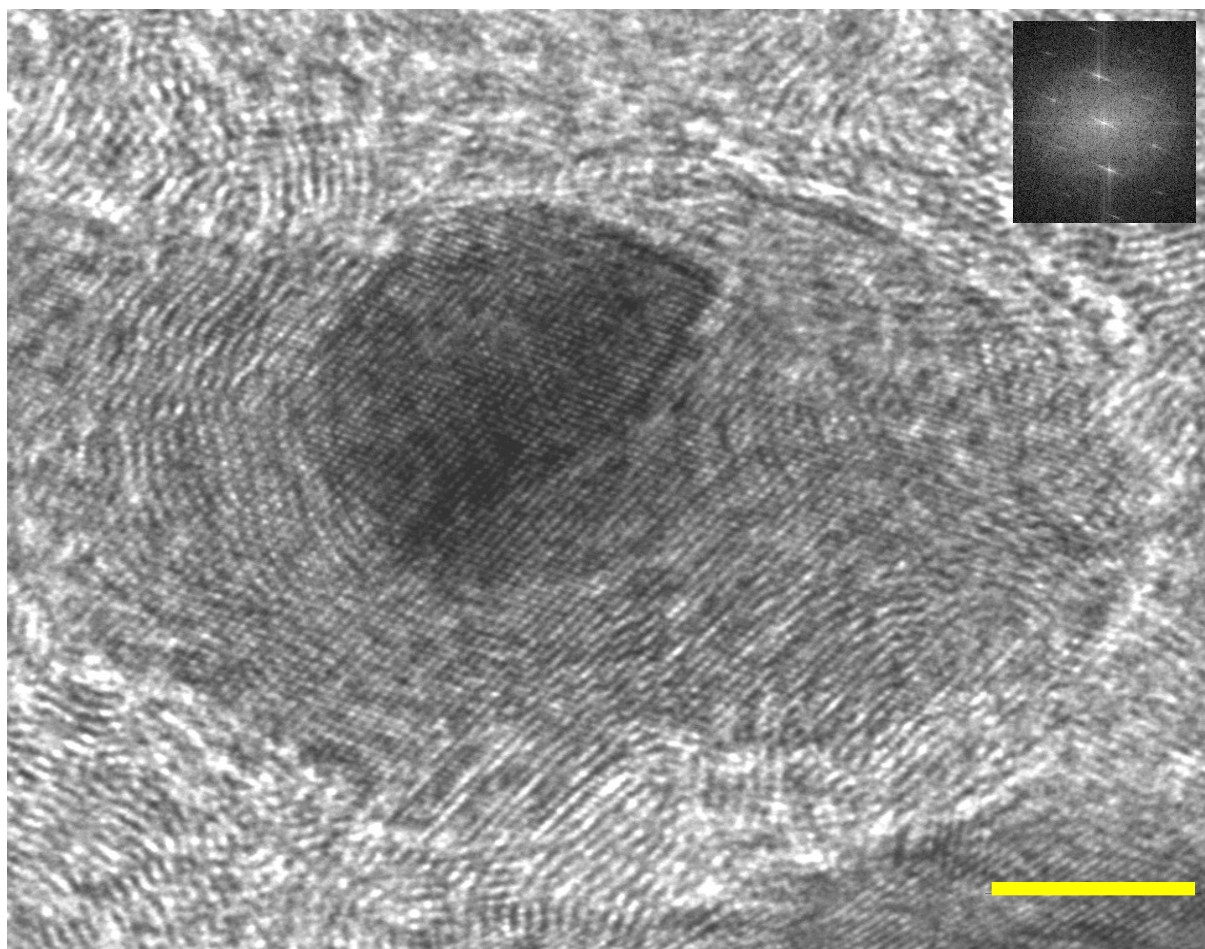

Figure S1: HRTEM micrograph of carbon encapsulated molybdenum nitride anchored on reduced graphene oxide. Scale bar is 10 nm and insert is FFT pattern.

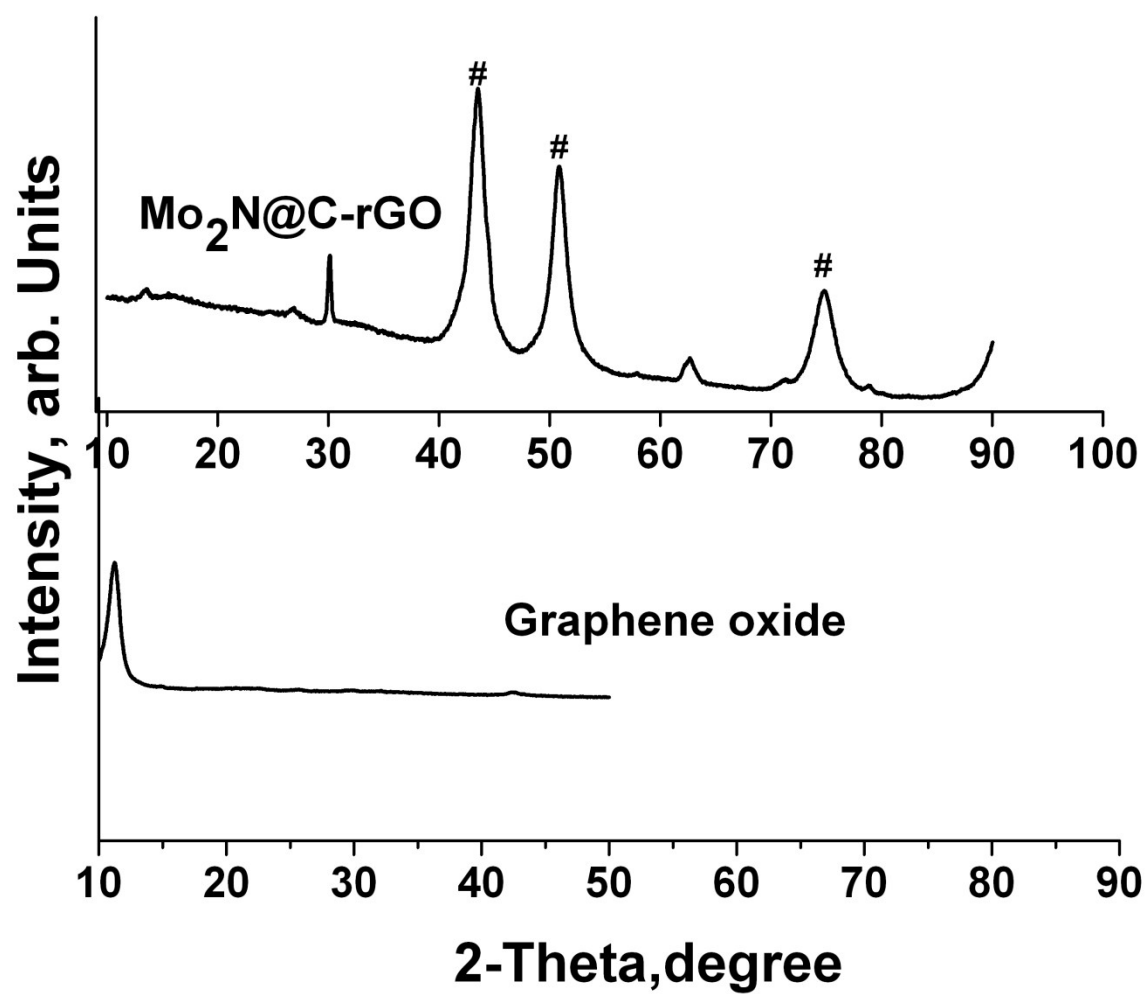

Figure S2 XRD of graphene oxide and  $\text{Mo}_2\text{N@C-rGO}$ .

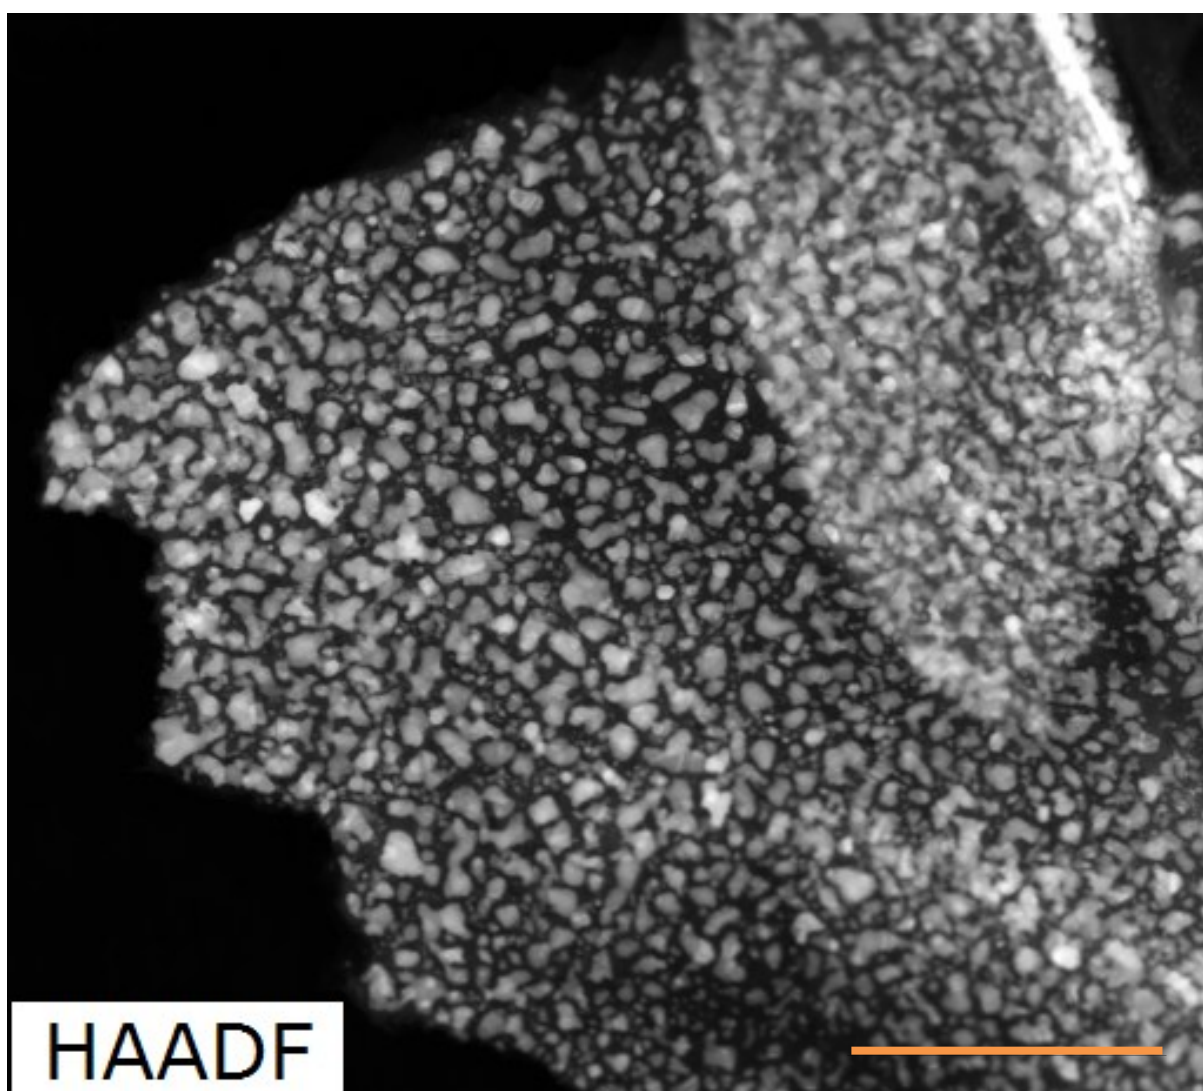

Figure S3: HRTEM-HAADF micrograph of carbon coated molybdenum nitride carbon coated molybdenum nitride anchored on reduced graphene oxide. Scale bar is 300 nm



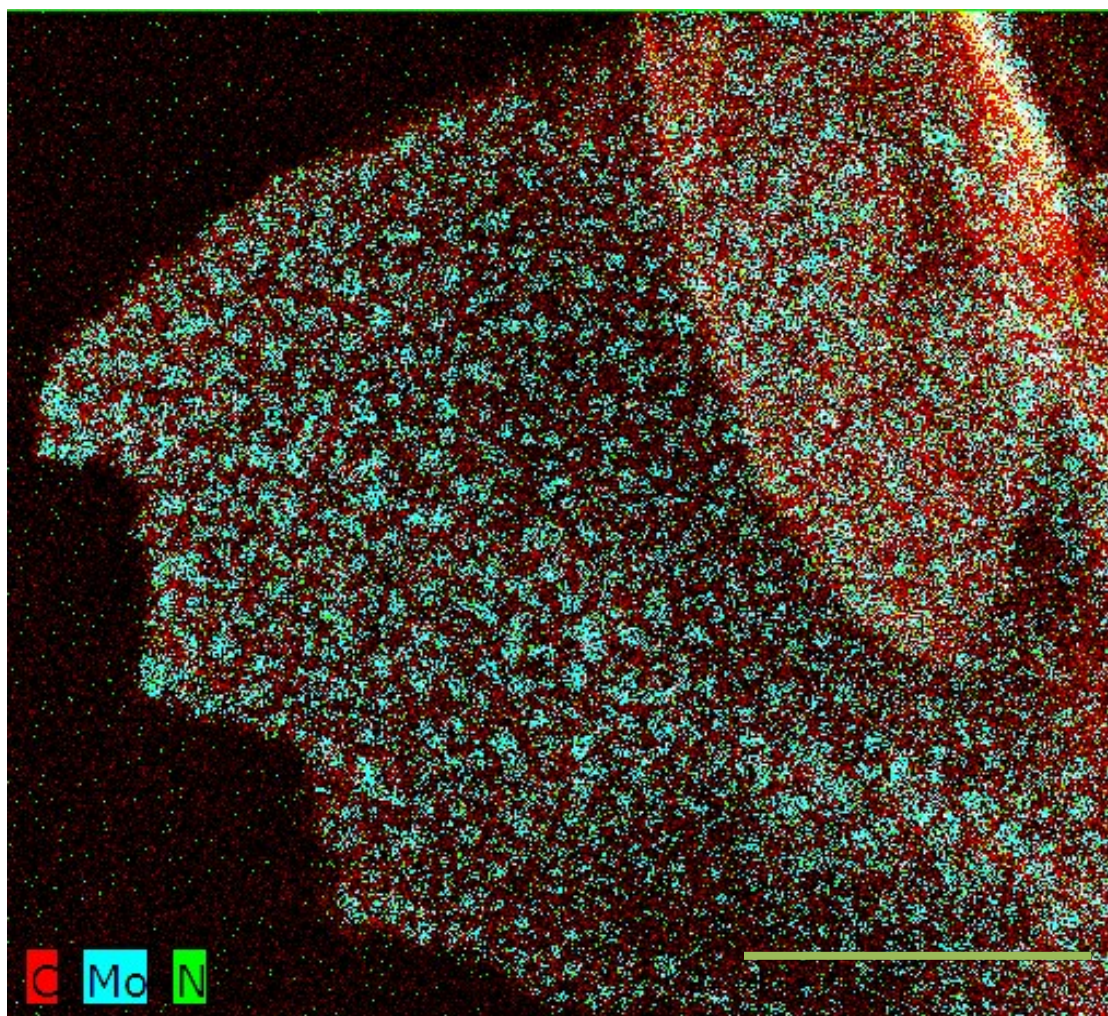

Figure S4: STEM-HAADF elemental map showing distribution of molybdenum, carbon and nitrogen moieties. Scale bar is 300 nm.

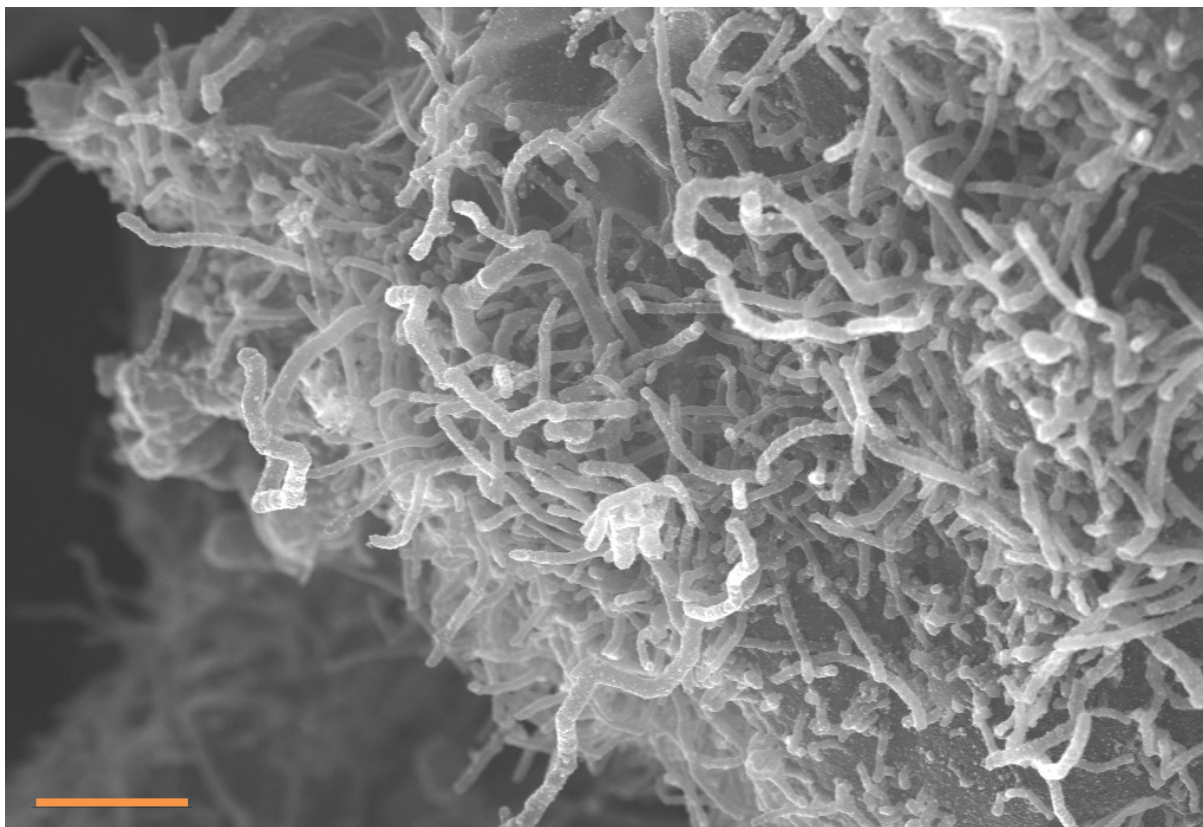

Figure S5: SEM micrographs of carbon nanotubes anchored on reduced graphene oxide synthesized from diazonium grafted graphene oxide using palladium as the catalyst. Scale bar is 2  $\mu\text{m}$



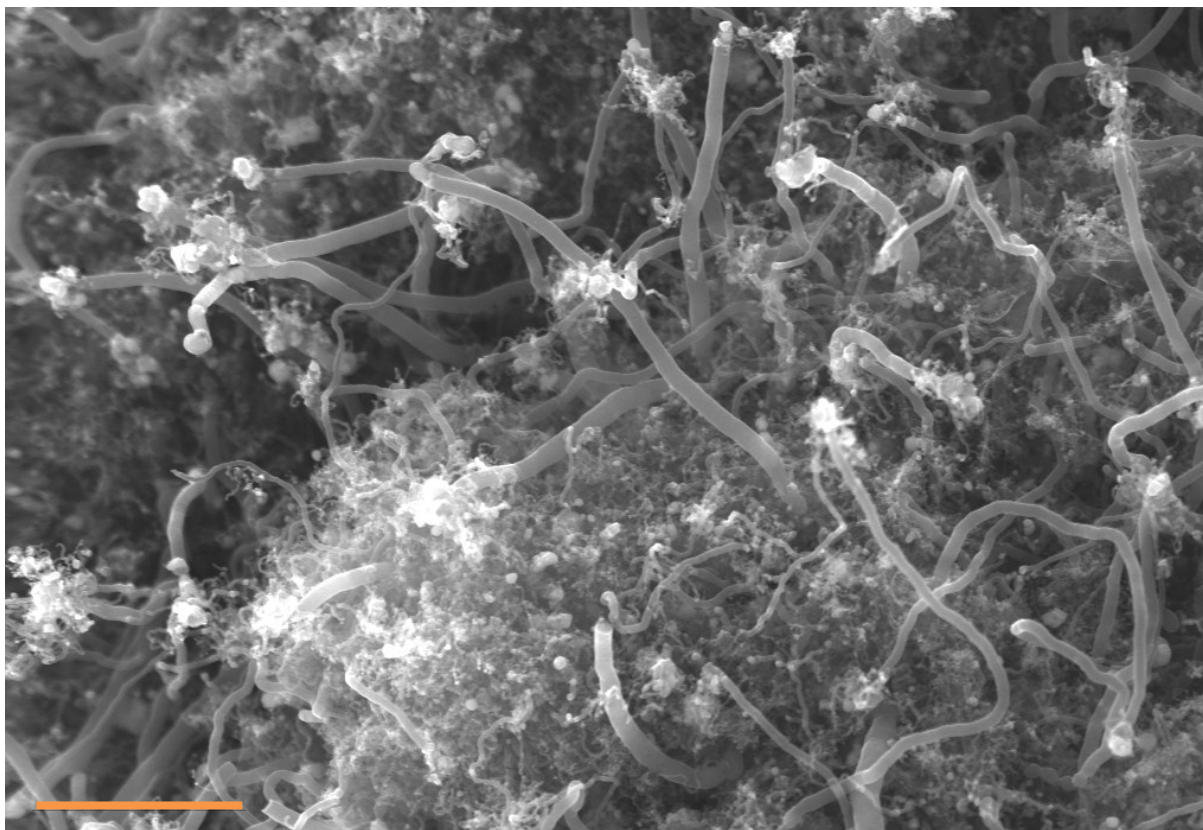

Figure S6: SEM micrographs of carbon nanotubes anchored on reduced graphene oxide synthesized from diazonium grafted graphene oxide using iron as the catalyst. Scale bar is 3  $\mu\text{m}$ .



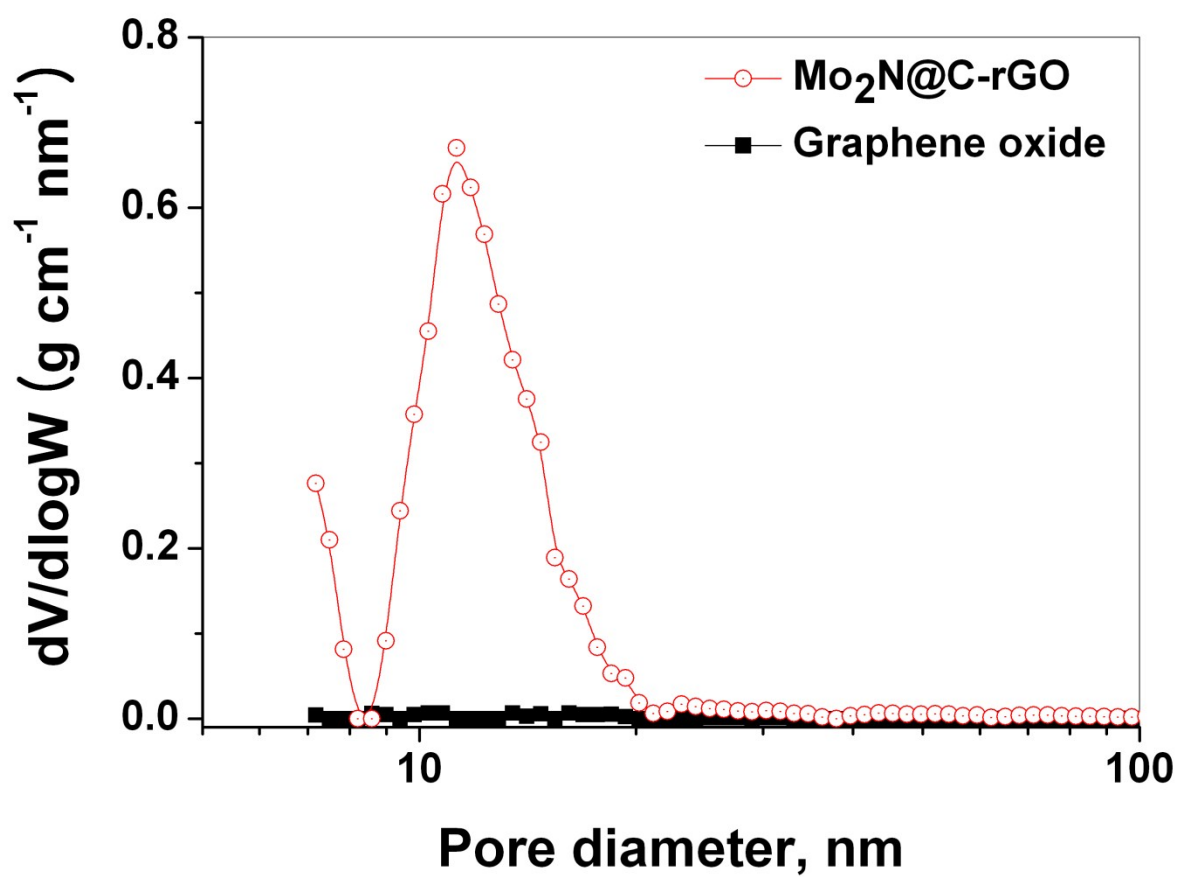

Figure S7: Pore size distribution of graphene oxide and Mo<sub>2</sub>N@C-rGO
